1 **Association between Binge Drinking Behaviors and Comorbidities in Brazil: Network Analysis**  
2 **of a National Health Survey**

3

4 *Short title: Binge drinking comorbidities in Brazil*

5

6 Authors: Siddhesh Zadey<sup>1,2,3,4</sup>, Diego Franca<sup>5</sup>, Pollyana Coelho Pessoa Santos<sup>2</sup>, Natan David Pereira<sup>5</sup>,  
7 Yolande Pokam Tchuisseu<sup>2</sup>, Luciano Andrade<sup>6</sup>, Bruno Pereira Nunes<sup>7</sup>, Wagner De Lara Machado<sup>8</sup>,  
8 Catherine A. Staton<sup>1,2,9</sup>, Joao Ricardo Nickenig Vissoci<sup>1,2,\*</sup>

9

10 Affiliations:

11 1 Global Emergency Medicine Innovation and Implementation Research Center, Duke University,  
12 Durham North Carolina USA

13 2 Duke Global Health Institute, Durham North Carolina USA

14 3 Association for Socially Applicable Research (ASAR), Pune, Maharashtra, India

15 4 Dr. D.Y. Patil Medical College, Hospital, and Research Center, Pune, Maharashtra, India

16 5 State University of Maringá, Paraná, Brazil

17 6 Department of Nursing, State University of the West of Parana, Foz do Iguaçu, Parana, Brazil

18 7 Faculty of Nursing, Federal University of Pelotas, Pelotas, Rio Grande do Sul, Brazil

19 8 Pontifical Catholic University of Rio Grande do Sul, Porto Alegre, Brazil

20 9 Department of Emergency Medicine, Duke University School of Medicine, Durham North Carolina  
21 USA

22

23 \*Corresponding author: Joao Ricardo Nickenig Vissoci

24 Email: [jnv4@duke.edu](mailto:jnv4@duke.edu) (JRNV)

**NOTE: This preprint reports new research that has not been certified by peer review and should not be used to guide clinical practice.**

25 **Abstract**

26

27 Alcohol consumption is the sixth leading cause of death globally. Brazil ranks second in alcohol-  
28 related mortality within the American regions with a notable increase in binge drinking behavior from  
29 2013 (5.9%) to 2019 (17.1%). Binge drinking, a form of alcohol misuse, is a known risk factor for  
30 several diseases. We aimed to understand the differences in binge drinking across various  
31 sociodemographic groups and the patterns of comorbidities in a national-level dataset by doing a  
32 cross-sectional network analysis of the 2013 Brazilian National Health Survey. Binge drinking was  
33 defined as a binary variable based on alcohol consumption of >5 (4) doses in a month for male  
34 (female) responders. Weighted undirected network analysis using Ising models was performed to  
35 discover the strength of inter-relations between nineteen chronic conditions. In the network, the nodes  
36 represented the conditions and the edges were formed by statistical associations derived using logistic  
37 regression. Community analyses identified the clusters within networks. A nationally representative  
38 sample of 60,202 people revealed the prevalence of binge drinking to be about 13.5%. The study  
39 revealed a less connected network among binge drinkers, potentially impacting disease associations.  
40 Binge drinking demonstrated unique correlations with comorbidities across age, gender, ethnicity, and  
41 education levels, highlighting the complex interplay between binge drinking and health outcomes.  
42 Recognizing the specific comorbidities associated with binge drinking, such as hypertension and  
43 chronic spinal problems, allows healthcare professionals to tailor preventive measures and early  
44 interventions. In this sense, differences in binge drinking and its direct association with comorbidities  
45 as well as in comorbidity structures across sociodemographic characteristics point to the utility of  
46 network models to identify specific populations at various health risks.

47

48

49

50

## 51 **Introduction**

52 Alcohol consumption poses a significant global public health concern, with detrimental effects on  
53 individuals and societies worldwide. In 2018, the average alcohol consumption per person globally  
54 was 6.2 liters of pure alcohol (1), resulting in approximately 3 million deaths annually attributed to  
55 harmful alcohol use(2). Compared to American regions, Brazil ranks second in terms of alcohol  
56 consumed per person and second in alcohol-related mortality within the American regions, while  
57 having the seventh-highest heavy drinking prevalence in 2019(3,4). Furthermore, Brazil not only  
58 demonstrates high average alcohol consumption per person-year (7.67 liters)(5) but also a notable  
59 increase in binge drinking behavior from 2013 (5.9%) to 2019 (17.1%) (6).

60 The impact of alcohol consumption on public health is represented for more than 200 diseases alcohol-  
61 related, being the leading risk factor for disease burden among people aged 25 to 49, and the second  
62 leading risk factor among people 10 to 24 years old (1,7). The correlation between alcohol  
63 consumption and multimorbidities is well-established, with the risk of developing diseases being  
64 directly correlated to the quantity of alcohol consumed (8). As such, alcohol use serves as a risk factor  
65 for systemic hypertension, ischemic heart disease, ischemic stroke, and hepatic conditions, among  
66 others (8). The consumption of five or more drinks for men and four or more drinks for women on a  
67 single occasion, or binge drinking(9), further exacerbates the burden of diseases. For instance,  
68 melanoma, head and neck, testicular, and cervical cancer are more likely in people who report binge  
69 drinking behavior (10). A Brazilian study found higher odds of currently suffering from depression  
70 among the binge-drinking population aged 18-39 years old, and this finding was significantly greater  
71 in female binge drinkers (11).

72 Network analysis is a useful technique to investigate the patterns of associations among different  
73 conditions at a population scale that measures the strength of the multivariate correlations between  
74 several diseases (12). While network analysis has been employed to study comorbidity associations  
75 in specific contexts, such as the elderly or individuals with cardiovascular diseases (12,13), limited  
76 research exists on the application of network analysis to binge-drinking populations. Most published

77 studies on this topic primarily explore its association with risky behaviors, environmental factors(14–  
78 17), or its correlation with major depressive disorders (18).

79 There is a paucity of network analysis literature on binge drinking and multimorbidity, particularly  
80 within a country with a high prevalence of alcohol consumption. As such, this study aims to examine  
81 the complex patterns of comorbidities and binge drinking behavior. We seek to compare the different  
82 multimorbidities correlations among binge drinking and non-binge drinking populations using the  
83 Brazilian National Healthy Survey. In addition, we aim to explore the interaction of binge drinking  
84 and morbidities within different demographic groups of that population.

## 85 **Materials and Methods**

### 86 *Study design and Ethics*

87 This was a retrospective secondary data analysis of a nationally representative cross-sectional survey.  
88 This national health survey has been de-identified and made publicly available, and as such an ethics  
89 or regulatory approval is not required according to Brazilian national policies.

### 90 *Setting & Study Population*

91 The data was collected from the 2013 Brazilian National Health Survey (PNS, *Plano Nacional de*  
92 *Saúde*) conducted by the Brazilian Institute of Geography and Statistics (IBGE) (19). The survey  
93 encompassed a nationwide demographic representation by interviewing 62,986 households across all  
94 regions in Brazil, including both urban and rural areas, between January 2013 and December 2013.  
95 To gather information about family and household conditions, a single participant above the age of  
96 14, who is deemed capable of providing the requested details, was interviewed in every household.  
97 The participants were asked about health access, use of health services, and lifestyle.  
98 Each participant completed socio-demographic questions of the PNS questionnaire with information  
99 about sex (male, female), age (18 to 24 years, 25 to 44 years, 45 to 64 years, 65 years or older),  
100 race/ethnicity (white, black/parda, yellow-skinned/indigenous), region (North, Northeast, Midwest,  
101 Southeast, South), and education level (no schooling, elementary/equivalent, secondary/equivalent,  
102 post-secondary/equivalent).

### 103 ***Chronic conditions***

104 In this study, we selected 13 chronic conditions from the Q module of the PNS questionnaire:  
105 hypertension, diabetes, cardiac diseases (including myocardial infarction, angina, or congestive heart  
106 failure), stroke, asthma, arthritis/rheumatoid arthritis, chronic musculoskeletal back disorders, work-  
107 related musculoskeletal disorder (WMSD), depression, psychiatric conditions (including  
108 schizophrenia, bipolar disorder, or obsessive-compulsive disorder), pulmonary disorders (including  
109 chronic obstructive pulmonary disorder, chronic bronchitis or emphysema), cancer, and chronic  
110 kidney failure (19). For chronic musculoskeletal back disorders, the questionnaire asked “Do you have  
111 any chronic spinal problems, such as chronic back or neck pain, low back pain, sciatic pain, or  
112 vertebral or disc problems?” On the other hand, the other conditions were asked as follows: “Has a  
113 doctor ever given you the diagnosis of [...]?” The 13 chronic conditions were dichotomously coded  
114 as no (0) or yes (1).

### 115 ***Outcome***

116 The PNS questionnaire measured binge drinking behavior using question 32 of module P, which asked  
117 “In the last 30 days, did you consume 5 or more doses of alcoholic beverage on one occasion, if male?”  
118 or “In the last 30 days, did you consume 4 or more doses of alcoholic beverage on one occasion, if  
119 female?” The answer options were no (0) and yes (1)(19).

### 120 ***Statistical methods***

#### 121 **Descriptive statistics**

122 We reported counts and proportions for sociodemographic variables. Also, we estimated the overall  
123 prevalence of the chronic conditions, as well as their prevalence in the binge drinking context.  
124 Prevalence of the chronic conditions by sociodemographic variables is available in Supplementary  
125 Materials. We adjusted all the proportion/prevalence estimates by sample weights.

126

## 127 **Network analysis**

128 Network analysis is a popular technique to investigate associations among multiple recurrent diseases  
129 in a population. The use of network analysis in the investigation of behavioral associations within  
130 large populations is complex, but its application allows the identification of multiple connections  
131 between modifiable and non-modifiable behaviors and their role in developing diseases including  
132 multimorbidities. The visualization of these associations can be made by network maps, which  
133 demonstrate the nature, relationship intensity, directionality, and dimension of the variable  
134 correlations(20). In the context of multimorbidities, network analyses are able to measure the strength  
135 of associations of health conditions, representing them in a multivariate 'map'. Thus, network analysis  
136 points to the existence of the relationship among two or more morbidities and, more importantly, the  
137 association that the condition exerts on the other nodes within the network (12).

138 In this study, we performed seven sets of network models. The first set contains an overall network,  
139 with all 13 chronic conditions and binge drinking behavior as nodes. The second one comprised  
140 chronic conditions networks divided by binge drinking behavior. The other five sets have chronic  
141 conditions and binge drinking behavior as nodes and were divided by the categories of sex, age,  
142 race/ethnicity, region, and education level (Table 1). A network model is a statistical and visualization  
143 technique that allows one to explore the relationship between variables(21,22). In this context, 'nodes'  
144 represent variables, and 'edges' represent the conditional association between nodes. Blue (red) edges  
145 show positive (negative) conditional associations and the edge thickness reveals the weight of the  
146 association.

147 **Table 1: Overview of the seven network sets.**

| Network set | By                      | Chronic conditions | Binge drinking behavior |
|-------------|-------------------------|--------------------|-------------------------|
| 1           | –                       | All                | Yes                     |
| 2           | Binge drinking behavior | All                | –                       |
| 3           | Sex                     | All                | Yes                     |
| 4           | Age                     | All                | Yes                     |

|   |                 |     |     |
|---|-----------------|-----|-----|
| 5 | Race/ethnicity  | All | Yes |
| 6 | Region          | All | Yes |
| 7 | Education level | All | Yes |

---

148

149 Due to the dichotomous nature of the variables, we estimated Ising Models for each network set,  
150 which performs nodewise logistic regressions(23). To handle false-positive coefficients, we used the  
151 Least Absolute Shrinkage and Selection Operator (LASSO)(24). LASSO penalizes all edge-weights  
152 toward zero and sets small weights to exactly zero, returning a sparser network. To choose the most  
153 appropriate strength of the penalty, we used the Extended Bayesian Information Criterion (EBIC) and  
154 set its tuning parameter  $\lambda$  to 0.25 (25). We computed centrality measures of betweenness (i.e., how  
155 often a node serves as the shortest path between other nodes), closeness (i.e., how close a node is, in  
156 average, to all other nodes), and expected influence (i.e., sum of all edge-weights connected to a node,  
157 considering the direction of the association), to investigate the importance of each node to the network  
158 structure (26,27).

159 We estimated node *predictability* for each node in order to measure how nodes connected to a  
160 particular node can predict it. In the network, predictability can be visualized by the ring around each  
161 node: colored areas mean the proportion of predictability each node has. We used the marginal correct  
162 classification (CCmarg) predictability measure. The interpretation is similar to the  $R^2$  (28). To find  
163 node communities, we performed the *spinglass* algorithm, which implies that connected nodes should  
164 belong to the same community, and nodes of different communities should not present links between  
165 them (29). To check the edge-weight accuracy and the centrality measures stability, we estimated  
166 1000 new samples through *bootstrapping* (23). Afterwards, we calculated bootstrapped confidence  
167 intervals for edge-weights and correlation stability coefficients (CS-coefficient) for centrality  
168 measures.

169 Data analysis was conducted in R software (v. 4.1.1) (30). We used the following R packages: *survey*  
170 (31) to adjust prevalences/proportions by sample weights, *mgm* (32) to estimate networks, *qgraph*

171 (33) to visualize the networks and compute centrality measures, *igraph* (34) to find node communities,  
172 and *bootnet* (23) to perform bootstrapping analysis.

## 173 Results

174 This study analyzed a total of 60,202 individuals, including 8,104 people with binge drinking behavior  
175 and 52,098 with no binge drinking behavior. In both analyzed groups, the majority of the population  
176 was from the Southeast region, reported to be black, and aged between 25 to 44 years old (Table 2).  
177 Among the binge drinking group, males presented the majority (74.5%), compared to females  
178 (25.5%), and 37.7% of the total binge drinking population completed a secondary educational level.  
179 In addition, the Northeast and Midwest regions presented a higher prevalence of people in the binge  
180 drinking group. People with hypertension and chronic spinal problems were the two groups with the  
181 highest prevalence of binge drinking, 13.7%, and 14.7% respectively (Table 3).

182

183 **Table 2: Study Sample characteristics by binge drinking behavior status.**

| Characteristic            | Overall                 |                         | Binge drinking behavior |                         | No binge drinking behavior |                         |
|---------------------------|-------------------------|-------------------------|-------------------------|-------------------------|----------------------------|-------------------------|
|                           | N = 60,202 <sup>1</sup> | % (95% CI) <sup>2</sup> | N = 8,104 <sup>1</sup>  | % (95% CI) <sup>2</sup> | N = 52,098 <sup>1</sup>    | % (95% CI) <sup>2</sup> |
| <b>Sex</b>                |                         |                         |                         |                         |                            |                         |
| Male                      | 25,920                  | 47.1% (46.4%, 47.9%)    | 5,702                   | 74.5% (72.8%, 76.1%)    | 20,218                     | 42.8% (42.0%, 43.6%)    |
| Female                    | 34,282                  | 52.9% (52.1%, 53.6%)    | 2,402                   | 25.5% (23.9%, 27.2%)    | 31,880                     | 57.2% (56.4%, 58.0%)    |
| <b>Age groups (years)</b> |                         |                         |                         |                         |                            |                         |
| 18 to 24                  | 7,823                   | 15.9% (15.4%, 16.5%)    | 1,239                   | 20.1% (18.4%, 22.0%)    | 6,584                      | 15.3% (14.7%, 15.9%)    |
| 25 to 44                  | 26,740                  | 40.8% (40.1%, 41.6%)    | 4,612                   | 53.0% (51.1%, 54.9%)    | 22,128                     | 38.9% (38.1%, 39.7%)    |
| 45 to 64                  | 17,927                  | 31.0% (30.3%, 31.7%)    | 2,017                   | 24.3% (22.8%, 25.9%)    | 15,910                     | 32.0% (31.3%, 32.8%)    |
| 65 or older               | 7,712                   | 12.3% (11.8%, 12.8%)    | 236                     | 2.6% (2.1%, 3.2%)       | 7,476                      | 13.8% (13.3%, 14.4%)    |
| <b>Race</b>               |                         |                         |                         |                         |                            |                         |
| White                     | 24,106                  | 47.5% (46.7%, 48.3%)    | 2,887                   | 43.2% (41.3%, 45.1%)    | 21,219                     | 48.1% (47.3%, 49.0%)    |



| Characteristic            | Overall                 |                         | Binge drinking behavior |                         | No binge drinking behavior |                         |
|---------------------------|-------------------------|-------------------------|-------------------------|-------------------------|----------------------------|-------------------------|
|                           | N = 60,202 <sup>1</sup> | % (95% CI) <sup>2</sup> | N = 8,104 <sup>1</sup>  | % (95% CI) <sup>2</sup> | N = 52,098 <sup>1</sup>    | % (95% CI) <sup>2</sup> |
| Black/Parda               | 35,146                  | 51.2% (50.4%, 52.0%)    | 5,082                   | 55.6% (53.7%, 57.5%)    | 30,064                     | 50.5% (49.6%, 51.3%)    |
| Yellow-skinned/Indigenous | 950                     | 1.4% (1.2%, 1.5%)       | 135                     | 1.2% (0.9%, 1.5%)       | 815                        | 1.4% (1.2%, 1.6%)       |
| <b>Region</b>             |                         |                         |                         |                         |                            |                         |
| North                     | 12,536                  | 7.4% (7.2%, 7.6%)       | 1,657                   | 7.7% (7.0%, 8.5%)       | 10,879                     | 7.4% (7.2%, 7.6%)       |
| Northeast                 | 18,305                  | 26.6% (26.1%, 27.1%)    | 2,746                   | 30.4% (28.8%, 32.2%)    | 15,559                     | 26.0% (25.5%, 26.6%)    |
| Midwest                   | 7,519                   | 7.4% (7.2%, 7.6%)       | 1,144                   | 8.7% (8.0%, 9.5%)       | 6,375                      | 7.2% (6.9%, 7.4%)       |
| Southeast                 | 14,294                  | 43.8% (43.1%, 44.4%)    | 1,778                   | 41.1% (39.0%, 43.2%)    | 12,516                     | 44.2% (43.5%, 44.9%)    |
| South                     | 7,548                   | 14.8% (14.4%, 15.2%)    | 779                     | 12.0% (10.8%, 13.3%)    | 6,769                      | 15.2% (14.7%, 15.7%)    |
| <b>Education level</b>    |                         |                         |                         |                         |                            |                         |
| No schooling              | 9,434                   | 13.7% (13.2%, 14.2%)    | 845                     | 8.8% (7.8%, 9.9%)       | 8,589                      | 14.5% (13.9%, 15.1%)    |
| Elementary/equivalent     | 20,537                  | 35.2% (34.4%, 35.9%)    | 2,728                   | 33.7% (31.9%, 35.7%)    | 17,809                     | 35.4% (34.6%, 36.2%)    |
| Secondary/equivalent      | 19,438                  | 33.6% (32.9%, 34.4%)    | 2,973                   | 37.7% (35.7%, 39.8%)    | 16,465                     | 33.0% (32.2%, 33.8%)    |
| Post-secondary/equivalent | 10,793                  | 17.5% (16.7%, 18.3%)    | 1,558                   | 19.7% (18.0%, 21.6%)    | 9,235                      | 17.2% (16.4%, 18.0%)    |

<sup>1</sup>Population-weighted n. N represents the sample counts. The % values are based on weighted numbers.

<sup>2</sup>Population-weighted proportions and 95% confidence intervals (95% CI)

184 **Table 3: Comorbidities prevalences distributed in binge drinking behavior and no binge**  
 185 **drinking behavior groups.**

| Characteristic      | Overall                 |                         | Binge drinking behavior |                         | No binge drinking behavior |                         |
|---------------------|-------------------------|-------------------------|-------------------------|-------------------------|----------------------------|-------------------------|
|                     | N = 60,202 <sup>1</sup> | % (95% CI) <sup>2</sup> | N = 8,104 <sup>1</sup>  | % (95% CI) <sup>2</sup> | N = 52,098 <sup>1</sup>    | % (95% CI) <sup>2</sup> |
| <b>Hypertension</b> |                         |                         |                         |                         |                            |                         |
| No                  | 47,702                  | 78.6% (78.0%, 79.2%)    | 6,978                   | 86.3% (85.0%, 87.5%)    | 40,724                     | 77.4% (76.7%, 78.1%)    |

| Characteristic                | Overall                 |                         | Binge drinking behavior |                         | No binge drinking behavior |                         |
|-------------------------------|-------------------------|-------------------------|-------------------------|-------------------------|----------------------------|-------------------------|
|                               | N = 60,202 <sup>1</sup> | % (95% CI) <sup>2</sup> | N = 8,104 <sup>1</sup>  | % (95% CI) <sup>2</sup> | N = 52,098 <sup>1</sup>    | % (95% CI) <sup>2</sup> |
| Yes                           | 12,500                  | 21.4% (20.8%, 22.0%)    | 1,126                   | 13.7% (12.5%, 15.0%)    | 11,374                     | 22.6% (21.9%, 23.3%)    |
| <b>Type 2 diabetes</b>        |                         |                         |                         |                         |                            |                         |
| No                            | 56,566                  | 93.8% (93.4%, 94.1%)    | 7,874                   | 97.3% (96.7%, 97.8%)    | 48,692                     | 93.2% (92.8%, 93.6%)    |
| Yes                           | 3,636                   | 6.2% (5.9%, 6.6%)       | 230                     | 2.7% (2.2%, 3.3%)       | 3,406                      | 6.8% (6.4%, 7.2%)       |
| <b>Heart problems</b>         |                         |                         |                         |                         |                            |                         |
| No                            | 57,969                  | 95.8% (95.5%, 96.1%)    | 7,949                   | 98.1% (97.6%, 98.5%)    | 50,020                     | 95.5% (95.1%, 95.8%)    |
| Yes                           | 2,233                   | 4.2% (3.9%, 4.5%)       | 155                     | 1.9% (1.5%, 2.4%)       | 2,078                      | 4.5% (4.2%, 4.9%)       |
| <b>Stroke</b>                 |                         |                         |                         |                         |                            |                         |
| No                            | 59,236                  | 98.5% (98.3%, 98.6%)    | 8,058                   | 99.3% (98.8%, 99.6%)    | 51,178                     | 98.3% (98.1%, 98.5%)    |
| Yes                           | 966                     | 1.5% (1.4%, 1.7%)       | 46                      | 0.7% (0.4%, 1.2%)       | 920                        | 1.7% (1.5%, 1.9%)       |
| <b>Asthma</b>                 |                         |                         |                         |                         |                            |                         |
| No                            | 57,582                  | 95.6% (95.3%, 95.9%)    | 7,767                   | 96.1% (95.3%, 96.7%)    | 49,815                     | 95.5% (95.2%, 95.8%)    |
| Yes                           | 2,620                   | 4.4% (4.1%, 4.7%)       | 337                     | 3.9% (3.3%, 4.7%)       | 2,283                      | 4.5% (4.2%, 4.8%)       |
| <b>Arthritis/Rheumatism</b>   |                         |                         |                         |                         |                            |                         |
| No                            | 56,226                  | 93.6% (93.2%, 93.9%)    | 7,864                   | 97.1% (96.4%, 97.7%)    | 48,362                     | 93.0% (92.6%, 93.4%)    |
| Yes                           | 3,976                   | 6.4% (6.1%, 6.8%)       | 240                     | 2.9% (2.3%, 3.6%)       | 3,736                      | 7.0% (6.6%, 7.4%)       |
| <b>Chronic spinal problem</b> |                         |                         |                         |                         |                            |                         |
| No                            | 49,624                  | 81.5% (80.9%, 82.2%)    | 6,881                   | 85.3% (83.9%, 86.6%)    | 42,743                     | 80.9% (80.2%, 81.6%)    |
| Yes                           | 10,578                  | 18.5% (17.8%, 19.1%)    | 1,223                   | 14.7% (13.4%, 16.1%)    | 9,355                      | 19.1% (18.4%, 19.8%)    |
| <b>WMSD</b>                   |                         |                         |                         |                         |                            |                         |

| Characteristic                   | Overall                 |                         | Binge drinking behavior |                         | No binge drinking behavior |                         |
|----------------------------------|-------------------------|-------------------------|-------------------------|-------------------------|----------------------------|-------------------------|
|                                  | N = 60,202 <sup>1</sup> | % (95% CI) <sup>2</sup> | N = 8,104 <sup>1</sup>  | % (95% CI) <sup>2</sup> | N = 52,098 <sup>1</sup>    | % (95% CI) <sup>2</sup> |
| No                               | 59,053                  | 97.6% (97.3%, 97.8%)    | 7,943                   | 97.3% (96.6%, 98.0%)    | 51,110                     | 97.6% (97.3%, 97.8%)    |
| Yes                              | 1,149                   | 2.4% (2.2%, 2.7%)       | 161                     | 2.7% (2.0%, 3.4%)       | 988                        | 2.4% (2.2%, 2.7%)       |
| <b>Major depressive disorder</b> |                         |                         |                         |                         |                            |                         |
| No                               | 55,967                  | 92.4% (91.9%, 92.8%)    | 7,723                   | 95.2% (94.4%, 95.9%)    | 48,244                     | 91.9% (91.4%, 92.4%)    |
| Yes                              | 4,235                   | 7.6% (7.2%, 8.1%)       | 381                     | 4.8% (4.1%, 5.6%)       | 3,854                      | 8.1% (7.6%, 8.6%)       |
| <b>Other mental disorders</b>    |                         |                         |                         |                         |                            |                         |
| No                               | 59,650                  | 99.1% (98.9%, 99.2%)    | 8,064                   | 99.6% (99.4%, 99.8%)    | 51,586                     | 99.0% (98.8%, 99.1%)    |
| Yes                              | 552                     | 0.9% (0.8%, 1.1%)       | 40                      | 0.4% (0.2%, 0.6%)       | 512                        | 1.0% (0.9%, 1.2%)       |
| <b>Lung problems</b>             |                         |                         |                         |                         |                            |                         |
| No                               | 59,268                  | 98.2% (98.0%, 98.4%)    | 7,993                   | 98.6% (98.1%, 99.0%)    | 51,275                     | 98.2% (97.9%, 98.4%)    |
| Yes                              | 934                     | 1.8% (1.6%, 2.0%)       | 111                     | 1.4% (1.0%, 1.9%)       | 823                        | 1.8% (1.6%, 2.1%)       |
| <b>Cancer</b>                    |                         |                         |                         |                         |                            |                         |
| No                               | 59,179                  | 98.2% (98.0%, 98.4%)    | 8,054                   | 99.2% (98.7%, 99.5%)    | 51,125                     | 98.0% (97.8%, 98.2%)    |
| Yes                              | 1,023                   | 1.8% (1.6%, 2.0%)       | 50                      | 0.8% (0.5%, 1.3%)       | 973                        | 2.0% (1.8%, 2.2%)       |
| <b>Chronic kidney failure</b>    |                         |                         |                         |                         |                            |                         |
| No                               | 59,363                  | 98.6% (98.4%, 98.7%)    | 8,028                   | 99.1% (98.8%, 99.4%)    | 51,335                     | 98.5% (98.3%, 98.7%)    |
| Yes                              | 839                     | 1.4% (1.3%, 1.6%)       | 76                      | 0.9% (0.6%, 1.2%)       | 763                        | 1.5% (1.3%, 1.7%)       |

<sup>1</sup>Population-weighted n. N represents the sample counts. The % values are based on weighted numbers.

<sup>2</sup>Population-weighted proportions and 95% confidence intervals (95% CI).

186 In the network analysis of binge drinking and comorbidities together, community 1 was represented  
187 by hypertension, type 2 diabetes, heart problems, stroke, and cancer, community 2 by asthma and lung  
188 problems, community 3 by arthritis/ rheumatism, chronic spinal problems, work-related  
189 musculoskeletal disorder (WMSD), and chronic kidney failure, and community 4 by major depressive  
190 disorder, and other mental disorders (Fig 1). Among all these communities, alcohol use was negatively  
191 related to almost all community 1 diseases and to arthritis/rheumatism in community 3. Looking at  
192 expected influence, binge drinking behavior negatively influenced the network structure.

193 **Fig 1. Binge drinking network and betweenness, closeness, and expected influence among**  
194 **comorbidities.**

195 When comparing the comorbidities within binge drinking and no binge drinking behavior groups,  
196 networks were less connected in the binge drinking group and community connections changed  
197 between networks (Fig 2). Lung problems showed stronger connections with other mental disorders  
198 and major depressive disorders and became part of a new community in the binge drinking group  
199 composed of asthma, WMSD, major depressive episodes, other mental disorders, and lung problems.  
200 Cancer did not connect to other nodes in the binge drinking behavior network. Also, heart problems  
201 seemed to be more related to chronic kidney failure and arthritis/rheumatism, generating a new  
202 community including these nodes and chronic spinal problems.

203 **Fig 2. Networking and betweenness, closeness, and expected influence comparing different**  
204 **comorbidities within binge drinking and no binge drinking behavior groups.**

205 The betweenness of hypertension was higher for the no binge drinking behavior network, while the  
206 variable heart problems had a higher betweenness for the binge drinking behavior network. In terms  
207 of expected influence, other mental disorders showed a higher value for the binge drinking behavior  
208 network than the other network. The closeness among binge drinking and no binge drinking behavior  
209 was very similar except for the higher values of hypertension closeness for the no binge drinking  
210 group (Fig 2).

211 Concerning the network analysis comparing different demographic characteristics, binge drinking was  
212 more strongly and negatively connected with stroke and cancer in the male than in the female network  
213 (S1 Figure, S2 Table). The male network showed stronger connections between nodes from  
214 Community 1 and other nodes of the network. Lung problems showed higher betweenness in the male  
215 network, while expected influence showed very similar patterns across the networks. Analyzing the  
216 network patterns through different ages, weak and negative edges were found between binge drinking  
217 behavior and major depressive disorder in people aged 25 to 44 years (S2 Figure, S2 Table). A weak  
218 negative connection between binge drinking and Arthritis/Rheumatism or major depressive disorder  
219 was also identified in the 45 to 64-year-old population. A sparser network was found for the 18 to 24-  
220 year network, revealing a low connection between morbidities in this age group. Binge drinking  
221 behavior stratified by age showed low scores for all centrality measures in the four networks. Major  
222 depressive disorder showed higher values of Expected Influence in all the networks.

223 Relating to race, binge drinking behavior showed stronger and negative edges with cancer, type 2  
224 diabetes, and arthritis/rheumatism in the white network when compared to the black/parda network  
225 (S3 Figure, S3 Table). No connection was found between WMSD and lung problems in the white race  
226 network, unlike the results of the other networks. For the different regions, binge drinking behavior  
227 showed the strongest connection with stroke in the Northeast network when compared across all  
228 networks (S4 Figure, S4 Table). In addition, binge drinking behavior was not associated with other  
229 nodes in the post-secondary/equivalent network (S5 Figure, S5 Table). Lower levels of education  
230 showed more connections between binge drinking behavior and chronic conditions.

231

## 232 **Discussion**

233 Using network analysis, our study aimed to understand the associations between binge drinking  
234 behaviors and the presence of co-morbid diseases across multiple socio-demographic dimensions. In  
235 general, we observed a higher prevalence of binge drinking in men in the 25-44 years age group, who  
236 identified as black/pardo, and those with secondary schooling or equivalent. The main network model

237 revealed hypertension and chronic spinal problems as the main comorbidities among people with  
238 binge drinking. However, variations in the patterns of comorbidities across population groups  
239 belonging to different socio-demographic strata are noteworthy.

240 The overall prevalence of binge drinking in the studied population was found to be 13.5%, which is  
241 lower than the global prevalence for individuals over 15 years old in 2016 (18.2%), as reported by the  
242 World Health Organization (1). However, it should be noted that the exclusion of adolescents from  
243 the study may have influenced this result as the average age of first-time alcohol use among Brazilian  
244 adolescents is 13 years old (35). Furthermore, in our study, people aged 25-44 years old were the  
245 majority, while young adults represented 20.1% of that population. In terms of gender, there was an  
246 increase in weekly alcohol consumption among women from 2013 (23.9%) to 2019 (26%), according  
247 to the Brazilian Institute of Geographic and Statistics (36). Notably, the present study reports a  
248 prevalence of binge drinking in the women population of 25.5%, higher than the global heavy episodic  
249 drinking prevalence of 19.9% for this gender (1). This result can indicate an increased risk for binge  
250 drinking among women from Brazil, highlighting the need for attention toward this specific group.

251 While the findings of the 2013 Brazilian National Health Survey, including alcohol use prevalence,  
252 have been described previously by Macinko et al (37), the current study focused on highlighting the  
253 extent of binge drinking behavior, variations in it across socio-demographic strata, and its association  
254 with various comorbidities. In this sense, we observed that the network of the binge drinking behavior  
255 group presented much fewer connections than the no binge drinking behavior network. This finding  
256 may be indicative of the influence that alcohol use exerts on the connections between multiple  
257 diseases. A less connected network suggests that alcohol use may positively impact the presence of  
258 certain conditions, such as hypertension or stroke, to the point that it weakens other associations.  
259 Hereupon, binge drinking is a recognized risk factor for several conditions, including cardiovascular  
260 diseases, type 2 diabetes, and arthritis/ rheumatism, among others (8). Additionally, our results may  
261 also reflect lower rates of binge drinking behavior among the elderly population, who are known to  
262 have a higher prevalence of comorbidities. In this regard, a study including adults over the age of 50

263 years with 2 or more comorbidities demonstrated that non-binge drinkers had a higher prevalence of  
264 multiple diseases compared to the binge-drinking group within that population (38).

265 The contrast between the network of individuals exhibiting binge drinking behavior and the network  
266 of non-binge drinkers is also evident in the patterns of connections within different disease  
267 communities. For instance, while community 3 within the no-binge drinking behavior group includes  
268 hypertension, type 2 diabetes, heart problems, stroke, and cancer, cancer represents its own  
269 community on the binge drinking behavior network. This disparity suggests that alcohol is altering  
270 the patterns of connections between comorbidities, possibly exerting a substantial effect on the  
271 development of cancer. In fact, alcohol is a well-established risk factor for cancer, including gastric,  
272 colorectal, pharyngeal, and breast cancer, and surpasses other potential risk factors in its influence (8).

273 Furthermore, even after diagnosis, alcohol consumption remains a common habit among individuals  
274 with cancer. A survey conducted in the United States revealed that among participants diagnosed with  
275 cancer over five years before the study, 57.1% reported being current drinkers, with 20.1% engaging  
276 in binge drinking behavior (10).

277 Our analysis of the correlation between binge drinking and comorbidities within different socio-  
278 demographic variables highlighted distinct connections for each group. For example, although it is  
279 stated in the literature a positive correlation between alcohol use and mental and behavioral  
280 diseases(8,11,39), our findings pointed to a weak negative correlation between binge drink and major  
281 depressive disorder (MDD) in patients aged 25 to 64 years old. In addition, the difference between  
282 sexes pointed to a strongly negative correlation between binge drink and cancer in males, compared  
283 to females. Despite that, there is a known correlation between alcohol and cancer, including cancers  
284 more frequent in men, such as colorectal, esophagus, throat, and liver cancers (40). About different  
285 ethnicities, the white population presented a stronger negative correlation between binge drinking and  
286 cancer, type 2 diabetes, and arthritis/ rheumatism. Moreover, although a negative correlation between  
287 higher education level and heavy drinkers is well known (41), stronger negative associations between  
288 binge drinking and chronic comorbidities were present in the lower educational levels group.

289 In the last two decades, network models have gained rapid popularity in health-related analyses to  
290 identify patterns of multimorbidity. Through multivariate modeling and sensitivity analyses, the  
291 application of networks attempts to understand population-level patterns of multimorbidity  
292 associations. These models have been used across different contexts and populations such as elderly  
293 health (13), cerebrovascular diseases (12), heart failure, and chronic obstructive pulmonary disease  
294 (42), as well as the correlation of multimorbidities and risk of COVID-19 hospitalization and mortality  
295 (43). Furthermore, the easy visualization of information allows the identification of patterns and,  
296 subsequently, the development of studies and the practical application of the findings (44). The present  
297 study used network analysis to identify patterns of comorbidities in binge-drinking populations in  
298 Brazil.

### 299 ***Strengths and Limitations***

300 Although network models can give insights into the causal pathways between nodes, directionality  
301 detection is not possible. Since some of the chronic conditions included in the study could result in  
302 death, this study naturally failed in the recruitment of potential participants who may not have survived  
303 until the date of the data collection. In addition, recall bias may have affected the results, given that  
304 all the measures were self-reported, exposing the data to possible information misreporting situations  
305 and inherent bias. Our study is also limited by the small binge-drinking population sample size. It is  
306 important to note that this study used the Brazilian National Survey from 2013 and some of these  
307 findings may be outdated, mainly, it does not reflect the impacts of the COVID-19 pandemic.

308 Despite the cited limitations, our study descriptively demonstrated the existence of groups more prone  
309 to binge drinking behavior. The use of network analysis allows a visual interpretation of the relevant  
310 variables in the context of the occurrence of health problems. This methodology enables an  
311 interpretation of the perspectives related to comorbidities, demonstrating elements that are common  
312 to all groups analyzed and allowing the formulation of hypotheses about the nature of comorbidities  
313 and, respectively, the implementation of specific policies and treatments based on the reality of the  
314 community (45). Furthermore, it is important to emphasize that the chances of error occurrence are



315 considerably lower due to the extensive tests performed so that they can be conducted in an automated  
316 manner (46).

317

### 318 **Authors' contributions**

319 SZ, DF, and JRNV performed the data curation, formal analysis, and methodology. PCPS and NDP  
320 participated in the original draft writing and review. SD CAS and JRNV contributed to  
321 conceptualization, project administration, and writing review. All the authors reviewed and accepted  
322 the final version.

323

### 324 **Conflicts of interest**

325 Authors declare no competing interests.

326

### 327 **Financial Disclosure Statement**

328 Authors received no specific funding for this work.

329

### 330 **Ethics Statement**

331 All data used for this analysis was obtained through a national health survey. Thus, this secondary  
332 data analysis used only de-identified publicly available data. Participants were not directly consented  
333 by the research team since all data was collected as a national policy survey. Data and documentation  
334 on the data set and data collection procedures are available at: <https://www.pns.icict.fiocruz.br/>

335

### 336 **Supplementary data:**

337 S1 Table. Chronic conditions and binge drinking prevalences according to sex.

338 S1 Figure. Chronic conditions and binge drinking Network according to sex.

339 S2 Table. Chronic conditions and binge drinking prevalences according to age.

340 S2 Figure. Chronic conditions and binge drinking Network according to age.

- 341 S3 Table. Chronic conditions and binge drinking prevalences according to ethnicity.
- 342 S3 Figure. Chronic conditions and binge drinking Network according to ethnicity.
- 343 S4 Table. Chronic conditions and binge drinking prevalences according to region.
- 344 S4 Figure. Chronic conditions and binge drinking Network according to region.
- 345 S5 Table. Chronic conditions and binge drinking prevalences according to educational level.
- 346 S5 Figure. Chronic conditions and binge drinking Network according to educational level.

347

## 348 REFERENCES:

- 349 1. World Health Organization. Global status report on alcohol and health 2018 [Internet]. Geneva:  
350 World Health Organization; 2018 [cited 2023 Mar 20]. 450 p. Available from:  
351 <https://apps.who.int/iris/handle/10665/274603>
- 352 2. WHO. Alcohol [Internet]. 2022 [cited 2023 Jul 14]. Available from: [https://www.who.int/news-](https://www.who.int/news-room/fact-sheets/detail/alcohol)  
353 [room/fact-sheets/detail/alcohol](https://www.who.int/news-room/fact-sheets/detail/alcohol)
- 354 3. Cerca de 85 mil mortes a cada ano são 100% atribuídas ao consumo de álcool nas Américas,  
355 constata estudo da OPAS/OMS - OPAS/OMS | Organização Pan-Americana da Saúde [Internet].  
356 [cited 2023 Jul 14]. Available from: [https://www.paho.org/pt/noticias/12-4-2021-cerca-85-mil-](https://www.paho.org/pt/noticias/12-4-2021-cerca-85-mil-mortes-cada-ano-sao-100-atribuidas-ao-consumo-alcool-nas-americas)  
357 [mortes-cada-ano-sao-100-atribuidas-ao-consumo-alcool-nas-americas](https://www.paho.org/pt/noticias/12-4-2021-cerca-85-mil-mortes-cada-ano-sao-100-atribuidas-ao-consumo-alcool-nas-americas)
- 358 4. Alcohol consumption - PAHO/WHO | Pan American Health Organization [Internet]. [cited 2023  
359 Jul 18]. Available from: <https://www.paho.org/en/enlace/alcohol-consumption>
- 360 5. Global Information System on Alcohol and Health [Internet]. [cited 2023 Jul 14]. Available from:  
361 <https://www.who.int/data/gho/data/themes/global-information-system-on-alcohol-and-health>
- 362 6. OECD. OECD Reviews of Health Systems: Brazil 2021 [Internet]. OECD; 2021 [cited 2023 Jul  
363 14]. (OECD Reviews of Health Systems). Available from: [https://www.oecd-ilibrary.org/social-](https://www.oecd-ilibrary.org/social-issues-migration-health/oecd-reviews-of-health-systems-brazil-2021_146d0dea-en)  
364 [issues-migration-health/oecd-reviews-of-health-systems-brazil-2021\\_146d0dea-en](https://www.oecd-ilibrary.org/social-issues-migration-health/oecd-reviews-of-health-systems-brazil-2021_146d0dea-en)
- 365 7. Global Burden | National Institute on Alcohol Abuse and Alcoholism (NIAAA) [Internet]. [cited  
366 2023 Jul 14]. Available from: [https://www.niaaa.nih.gov/alcohols-effects-health/alcohol-](https://www.niaaa.nih.gov/alcohols-effects-health/alcohol-topics/alcohol-facts-and-statistics/global-burden)  
367 [topics/alcohol-facts-and-statistics/global-burden](https://www.niaaa.nih.gov/alcohols-effects-health/alcohol-topics/alcohol-facts-and-statistics/global-burden)
- 368 8. Shield KD, Parry C, Rehm J. Chronic Diseases and Conditions Related to Alcohol Use. *Alcohol*  
369 *Res Curr Rev.* 2014;35(2):155–71.
- 370 9. Drinking Levels Defined | National Institute on Alcohol Abuse and Alcoholism (NIAAA)  
371 [Internet]. [cited 2023 Jul 18]. Available from: [https://www.niaaa.nih.gov/alcohol-](https://www.niaaa.nih.gov/alcohol-health/overview-alcohol-consumption/moderate-binge-drinking)  
372 [health/overview-alcohol-consumption/moderate-binge-drinking](https://www.niaaa.nih.gov/alcohol-health/overview-alcohol-consumption/moderate-binge-drinking)
- 373 10. Alcohol Use Among Patients With Cancer and Survivors in the United States, 2000–2017 in:  
374 *Journal of the National Comprehensive Cancer Network* Volume 18 Issue 1 (2020) [Internet].  
375 [cited 2023 Jul 18]. Available from: <https://jncn.org/view/journals/jncn/18/1/article-p69.xml>
- 376 11. Oancea SC, de Oliveira GD, Sukumaran P, Vogeltanz-Holm N, Nucci LB. The association  
377 between alcohol consumption and self-reported current depression among adults residing in  
378 Brazil. *J Public Health Oxf Engl.* 2020 Dec 26;43(2):e204–12.
- 379 12. IJERPH | Free Full-Text | Multimorbidity Analysis of 13 Systemic Diseases in Northeast  
380 China [Internet]. [cited 2023 Jul 18]. Available from: [https://www.mdpi.com/1660-](https://www.mdpi.com/1660-4601/17/6/1817)  
381 [4601/17/6/1817](https://www.mdpi.com/1660-4601/17/6/1817)
- 382 13. Identifying multimorbidity clusters among Brazilian older adults using network analysis:  
383 Findings and perspectives | PLOS ONE [Internet]. [cited 2023 Jul 18]. Available from:

- 384 <https://journals.plos.org/plosone/article?id=10.1371/journal.pone.0271639>
- 385 14. Lannoy S, Baggio S, Heeren A, Dormal V, Maurage P, Billieux J. What is binge drinking?  
386 Insights from a network perspective. *Addict Behav.* 2021 Jun 1;117:106848.
- 387 15. Lorant V, Nicaise P. Binge drinking at University: a social network study in Belgium. *Health*  
388 *Promot Int.* 2015 Sep;30(3):675–83.
- 389 16. Knox J, Schneider J, Greene E, Nicholson J, Hasin D, Sandfort T. Using social network  
390 analysis to examine alcohol use among adults: A systematic review. *PLoS ONE.* 2019 Aug  
391 22;14(8):e0221360.
- 392 17. Hahm HC, Kolaczyk E, Jang J, Swenson T, Bhindarwala AM. Binge drinking trajectories  
393 from adolescence to young adulthood: the effects of peer social network. *Subst Use Misuse.* 2012  
394 May;47(6):745–56.
- 395 18. Shim EJ, Ha H, Park JE, Kim BS, Chang SM, Hong JP, et al. Gender-based examination of  
396 the association between individual symptoms of alcohol use disorder, major depressive disorder,  
397 and suicidal behaviors: a network analysis of data from the Korean Epidemiologic Catchment  
398 Area Study. *J Affect Disord.* 2020 Jul 1;272:432–9.
- 399 19. Brazil National Survey of Health 2013 | GHDx [Internet]. [cited 2023 May 30]. Available  
400 from: <https://ghdx.healthdata.org/record/brazil-national-survey-health-2013>
- 401 20. Jones I, Cocker F, Jose M, Charleston M, Neil AL. Methods of analysing patterns of  
402 multimorbidity using network analysis: a scoping review. *J Public Health.* 2023 Aug  
403 1;31(8):1217–23.
- 404 21. Network analysis of multivariate data in psychological science | Nature Reviews Methods  
405 Primers [Internet]. [cited 2023 May 30]. Available from:  
406 <https://www.nature.com/articles/s43586-021-00055-w>
- 407 22. Cramer AOJ, Waldorp LJ, Maas HLJ van der, Borsboom D. Comorbidity: A network  
408 perspective. *Behav Brain Sci.* 2010 Jun;33(2–3):137–50.
- 409 23. Epskamp S, Borsboom D, Fried EI. Estimating psychological networks and their accuracy:  
410 A tutorial paper. *Behav Res Methods.* 2018 Feb 1;50(1):195–212.
- 411 24. Tibshirani R. Regression Shrinkage and Selection via the Lasso. *J R Stat Soc Ser B*  
412 *Methodol.* 1996;58(1):267–88.
- 413 25. Epskamp S, Fried EI. A tutorial on regularized partial correlation networks. *Psychol*  
414 *Methods.* 2018;23(4):617–34.
- 415 26. Bringmann LF, Elmer T, Epskamp S, Krause RW, Schoch D, Wichers M, et al. What Do  
416 Centrality Measures Measure in Psychological Networks? *J Abnorm Psychol* [Internet]. 2019;  
417 Available from: [/record/2019-39487-001?doi=1](https://doi.org/10.1037/abn0000487)
- 418 27. Robinaugh DJ, Millner AJ, McNally RJ. Identifying highly influential nodes in the  
419 complicated grief network. *J Abnorm Psychol.* 2016 Aug;125(6):747–57.
- 420 28. Haslbeck JMB, Waldorp LJ. How well do network models predict observations? On the  
421 importance of predictability in network models. *Behav Res Methods.* 2018 Apr 1;50(2):853–61.
- 422 29. Yang Z, Algesheimer R, Tessone CJ. A Comparative Analysis of Community Detection  
423 Algorithms on Artificial Networks. *Sci Rep.* 2016 Aug 1;6(1):30750.
- 424 30. R: The R Project for Statistical Computing [Internet]. [cited 2023 Nov 8]. Available from:  
425 <https://www.r-project.org/>
- 426 31. Lumley, Thomas. Analysis of complex survey samples. [Internet]. Available from:  
427 <file:///C:/Users/polly/OneDrive/Documents/GEMINI%20research/Binging%20drink/paper-5.pdf>
- 428 32. Haslbeck JMB, Waldorp LJ. mgm: Estimating Time-Varying Mixed Graphical Models in  
429 High-Dimensional Data [Internet]. arXiv; 2020 [cited 2023 Nov 8]. Available from:  
430 <http://arxiv.org/abs/1510.06871>
- 431 33. Epskamp S, Cramer AOJ, Waldorp LJ, Schmittmann VD, Borsboom D. qgraph: Network  
432 Visualizations of Relationships in Psychometric Data. *J Stat Softw.* 2012 May 24;48:1–18.
- 433 34. igraph – Network analysis software [Internet]. [cited 2023 Nov 8]. Available from:  
434 <https://igraph.org/>
- 435 35. Martins-Oliveira JG, Kawachi I, Paiva PCP, Paiva HN de, Pordeus IA, Zarzar PM.

- 436 Correlates of binge drinking among Brazilian adolescents. *Ciênc Saúde Coletiva*. 2018  
437 Oct;23:3445–52.
- 438 36. Pesquisa Nacional de Saúde (PNS) 2019: consumo de álcool - CISA - Centro de  
439 Informações sobre Saúde e Álcool [Internet]. [cited 2023 Nov 8]. Available from:  
440 <https://cisa.org.br/pesquisa/dados-oficiais/artigo/item/269-pns-2019>
- 441 37. Macinko J, Mullachery P, Silver D, Jimenez G, Neto OLM. Patterns of Alcohol  
442 Consumption and Related Behaviors in Brazil: Evidence from the 2013 National Health Survey  
443 (PNS 2013). *PLOS ONE*. 2015 Jul 31;10(7):e0134153.
- 444 38. Han BH, Moore AA, Sherman S, Palamar JJ. Prevalence and correlates of binge drinking  
445 among older adults with multimorbidity. *Drug Alcohol Depend*. 2018 Jun 1;187:48–54.
- 446 39. Parry C, Patra J, Rehm J. Alcohol consumption and non-communicable diseases:  
447 epidemiology and policy implications. *Addict Abingdon Engl*. 2011 Oct;106(10):1718–24.
- 448 40. Excessive Alcohol Use and Risks to Men’s Health | CDC [Internet]. 2023 [cited 2023 Nov  
449 8]. Available from: <https://www.cdc.gov/alcohol/fact-sheets/mens-health.htm>
- 450 41. Plens JA, Valente JY, Mari JJ, Ferrari G, Sanchez ZM, Rezende LFM. Patterns of alcohol  
451 consumption in Brazilian adults. *Sci Rep*. 2022 May 21;12(1):8603.
- 452 42. Carmona-Pérez J, Poblador-Plou B, Díez-Manglano J, Morillo-Jiménez MJ, Marín Trigo JM,  
453 Ioakeim-Skoufa I, et al. Multimorbidity networks of chronic obstructive pulmonary disease and  
454 heart failure in men and women: Evidence from the EpiChron Cohort. *Mech Ageing Dev*. 2021  
455 Jan 1;193:111392.
- 456 43. Carmona-Pérez J, Ioakeim-Skoufa I, Gimeno-Miguel A, Poblador-Plou B, González-Rubio  
457 F, Muñozerro-Muñiz D, et al. Multimorbidity Profiles and Infection Severity in COVID-19  
458 Population Using Network Analysis in the Andalusian Health Population Database. *Int J Environ  
459 Res Public Health*. 2022 Jan;19(7):3808.
- 460 44. Sensitivity of comorbidity network analysis | JAMIA Open | Oxford Academic [Internet].  
461 [cited 2023 Nov 8]. Available from: <https://academic.oup.com/jamiaopen/article/3/1/94/5690598>
- 462 45. Anker JJ, Forbes MK, Almquist ZW, Menk JS, Thuras P, Unruh AS, et al. A Network  
463 Approach to Modeling Comorbid Internalizing and Alcohol Use Disorders. *J Abnorm Psychol*.  
464 2017 Apr;126(3):325–39.
- 465 46. Jing C. A Formal Approach to Robustness Testing of Network Protocol [Internet]. Available  
466 from: A Formal Approach to Robustness Testing of Network Protocol  
467  
468  
469  
470  
471  
472  
473  
474  
475  
476  
477  
478  
479  
480  
481  
482  
483  
484  
485  
486  
487

488  
489  
490  
491  
492  
493  
494  
495  
496  
497  
498  
499  
500  
501  
502  
503  
504  
505

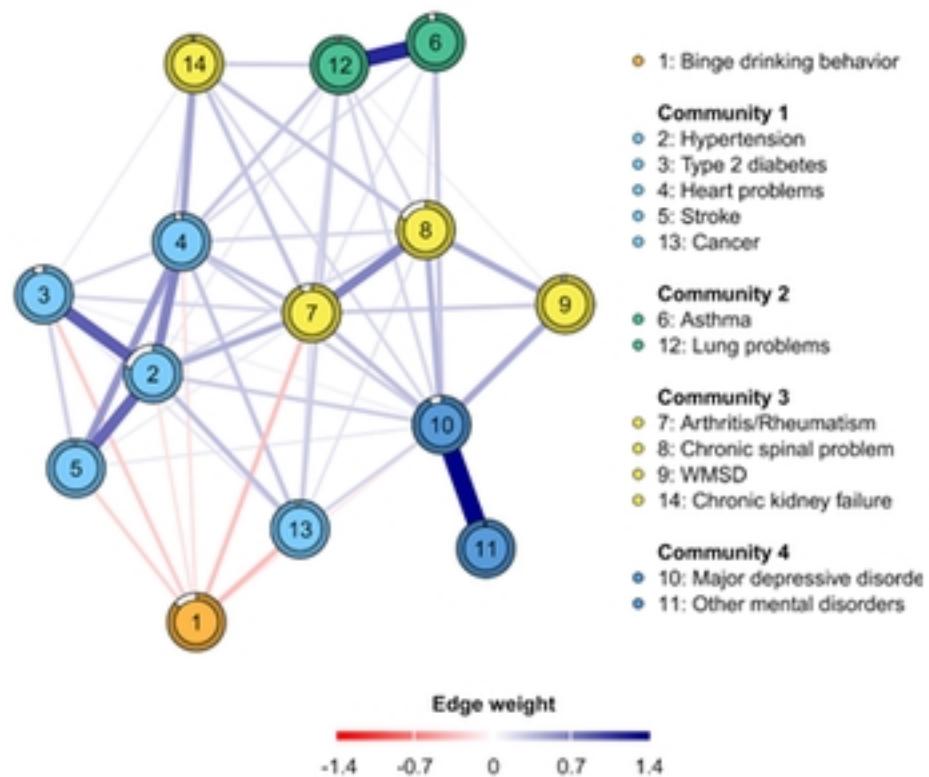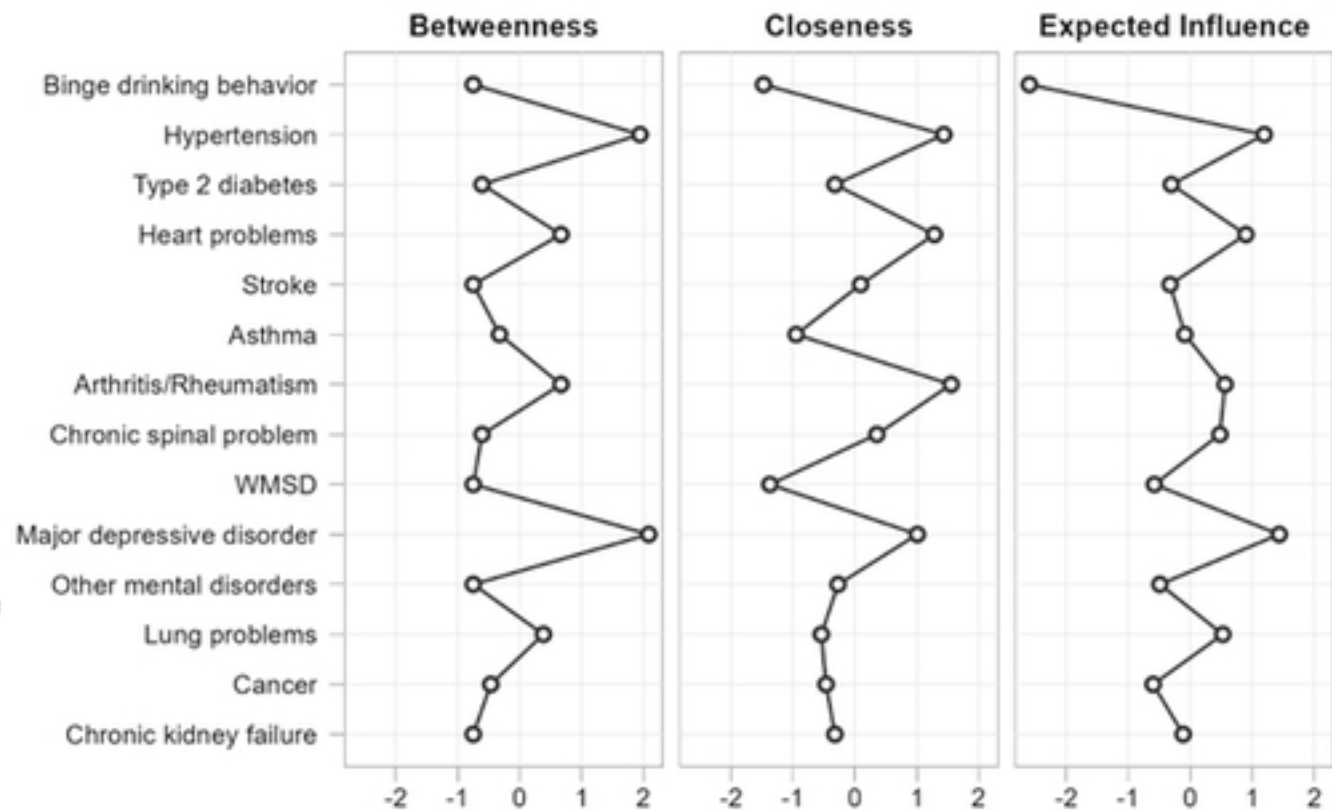

Fig 1

No binge drinking behavior

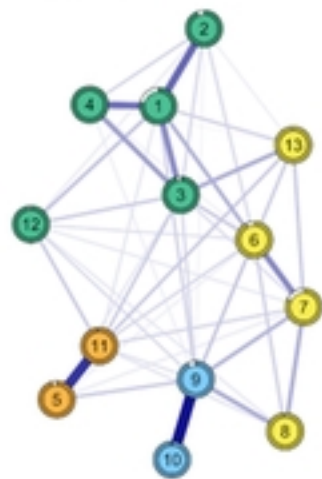

- Community 1**  
 5: Asthma  
 11: Lung problems
- Community 2**  
 9: Major depressive disorder  
 10: Other mental disorders
- Community 3**  
 1: Hypertension  
 2: Type 2 diabetes  
 3: Heart problems  
 4: Stroke  
 12: Cancer
- Community 4**  
 6: Arthritis/Rheumatism  
 7: Chronic spinal problem  
 8: WMSD  
 13: Chronic kidney failure

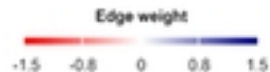

Binge drinking behavior

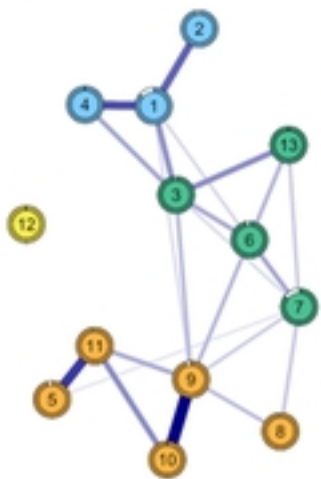

- Community 1**  
 5: Asthma  
 8: WMSD  
 9: Major depressive disorder  
 10: Other mental disorders  
 11: Lung problems
- Community 2**  
 1: Hypertension  
 2: Type 2 diabetes  
 4: Stroke
- Community 3**  
 3: Heart problems  
 6: Arthritis/Rheumatism  
 7: Chronic spinal problem  
 13: Chronic kidney failure
- Community 4**  
 12: Cancer

Betweenness

Closeness

Expected Influence

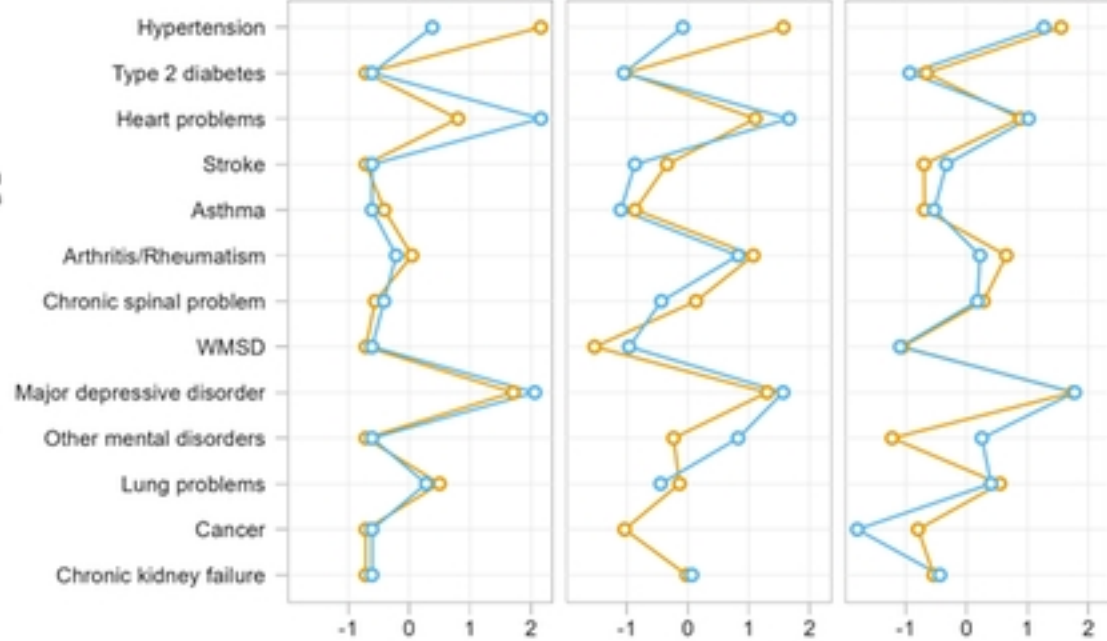

○ No binge drinking behavior ○ Binge drinking behavior

Fig 2
